# Supplementary material
Source: publisher figshare collection journal article supplement (https://aacr.figshare.com/ndownloader/files/39924329)
Supplement: Supplementary file 1 [file 39924329]

## Sheet: Sheet1
Table S4. Relationship between bench marker gene mutations and clinical benefit from ICI
Data set	Gene	Number of mutated patients	Number of non-mutated patients	P value (survival)	P value (response rate)
Snyder’s dataset	PTEN	4	60	0.13	0.63
	B2M	0	64	N/A	N/A
	MMR	5	59	0.16	0.15
Van Allen’s dataset	PTEN	8	100	0.28	0.26
	B2M	4	104	0.8	0.009
	MMR	15	93	0.08	0.23
combined dataset	PTEN	12	160	0.96	1
	B2M	4	168	0.37	0.23
	MMR	20	152	0.1	0.027
P value for survival was calculated by the log-rank test by comparing the survival time of patients with and without mutations.
P value for response was calculated by the Fisher’s exact test.
*N/A: not available.
